# Supplementary material
Source: publisher site journal article supplement (https://www.dovepress.com/article/341672)

**Supplementary Figure 1**


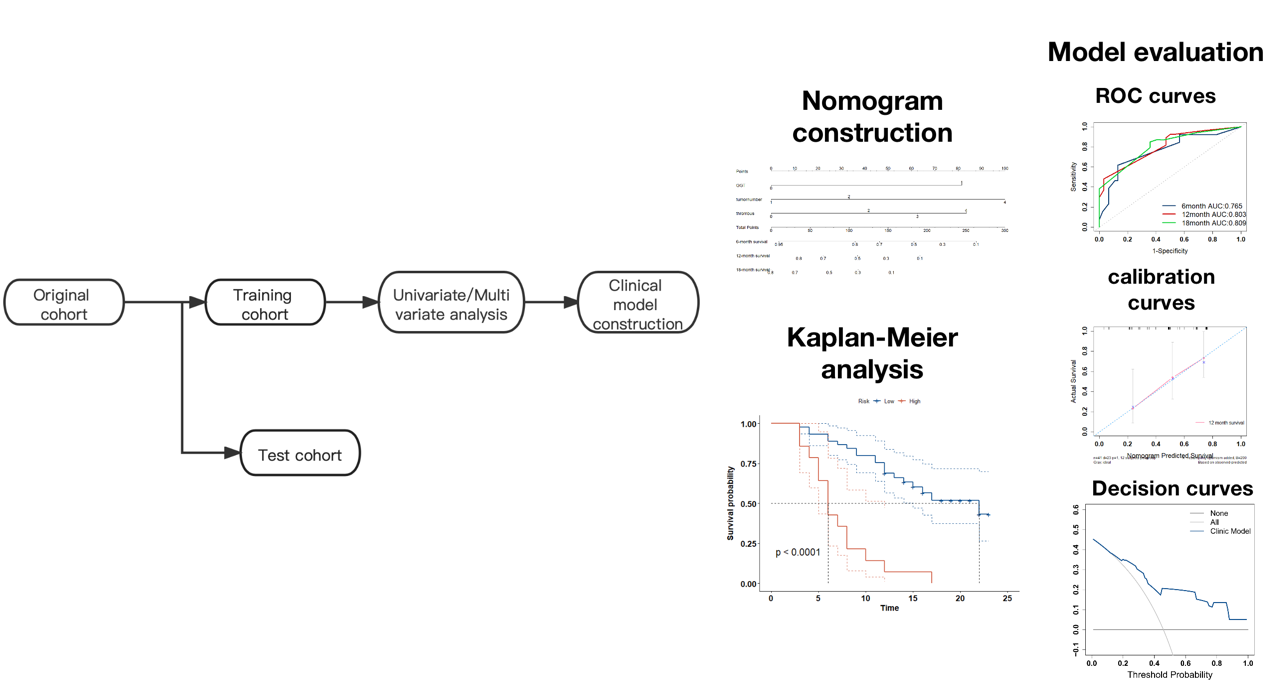


**Figure legend**

Workflow of the study.

Supplement: Supplementary file 1 [file get_supplementary_file.php]
